# Supplementary material
Source: Springer Nature journal article supplement (https://www.springermedizin.de/resource/supplementary/13256_2010_1339_MOESM1_ESM.pdf/9647558)

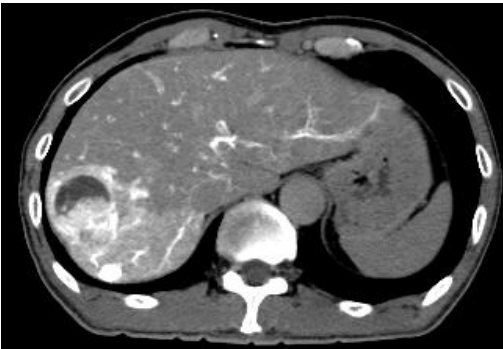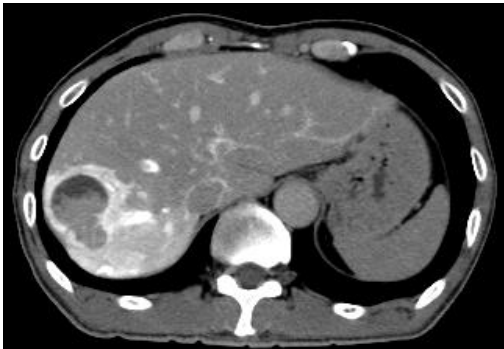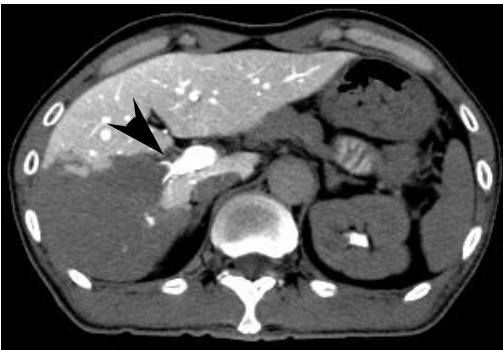

|   |   |
|---|---|
| a | b |
| c |   |

Supplement: MOESM1 [file 9647558]
